# Supplementary material for: Repeated Origin and Loss of Adhesive Toepads in Geckos
Source: PubMed Central journal article supplement (PMC3384654; doi:10.1371/journal.pone.0039429), 2012-06-27

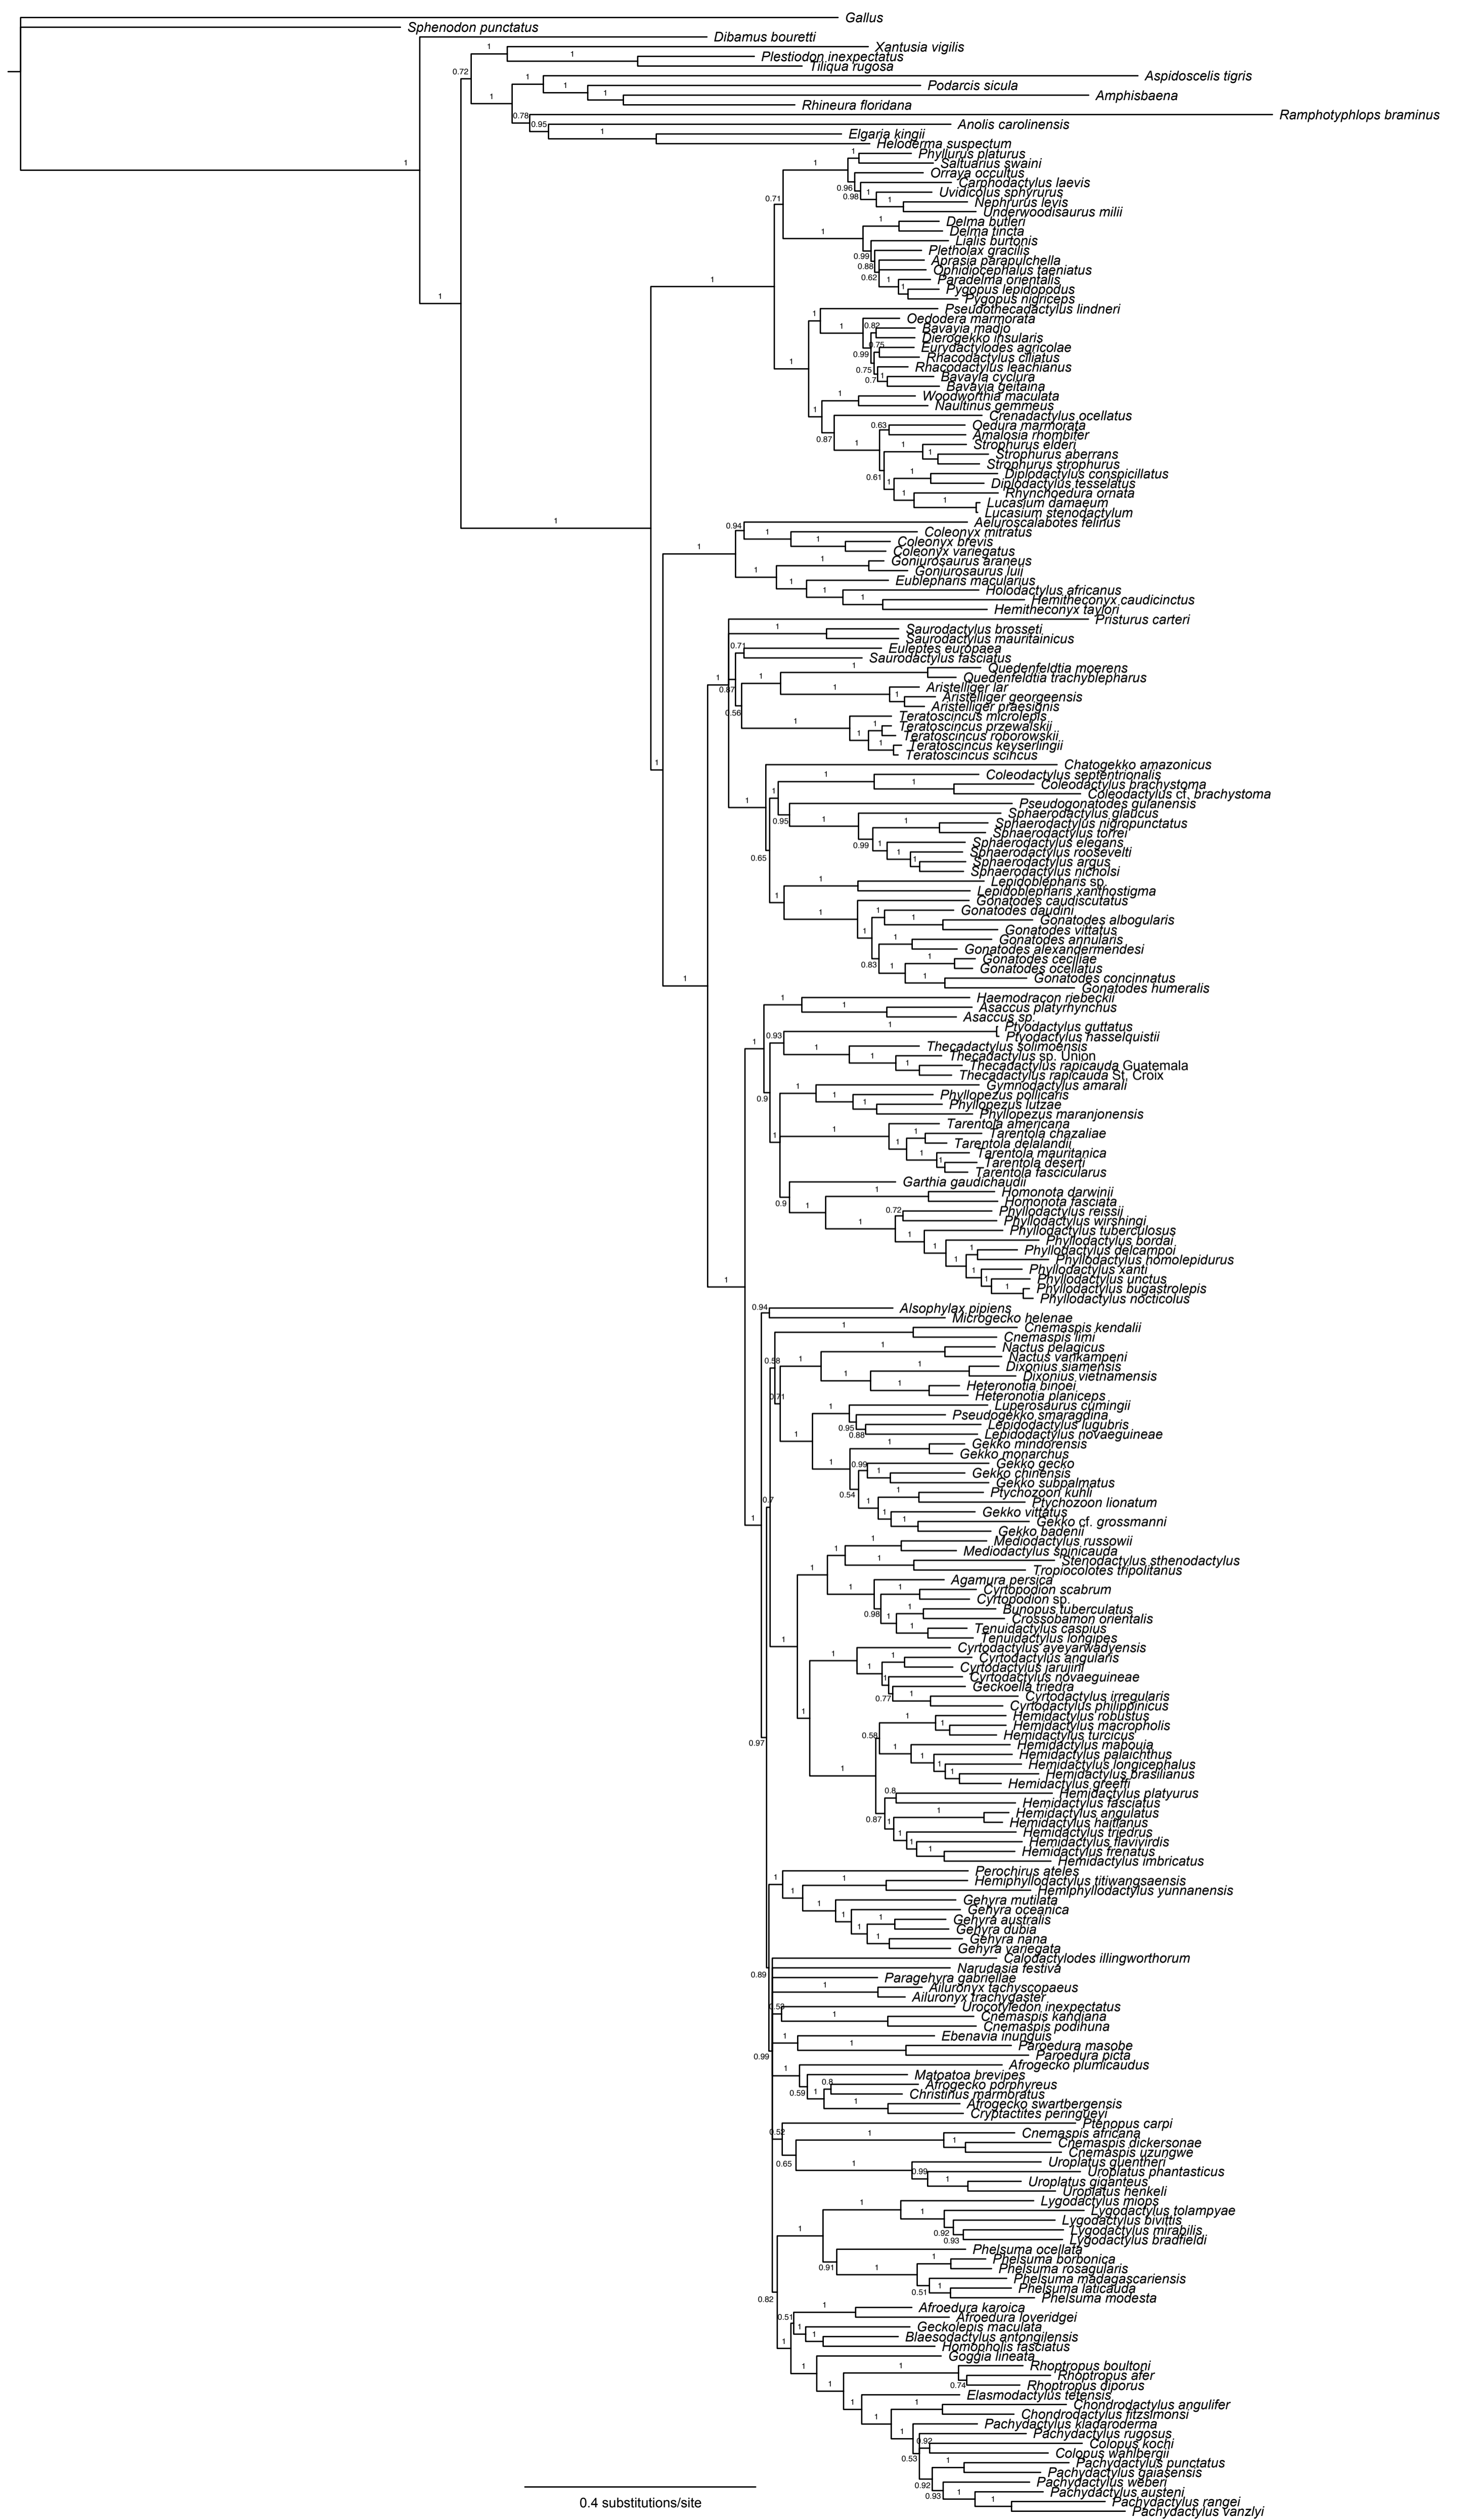

Supplement: pone.0039429.s002.pdf [file pone.0039429.s002.pdf]
