# Supplementary material for: Repeated Origin and Loss of Adhesive Toepads in Geckos
Source: PubMed Central journal article supplement (PMC3384654; doi:10.1371/journal.pone.0039429), 2012-06-27

Character: adhesive toe pads  
 Parsimony reconstruction (Unordered) [Reps: 20]

0 (pads absent)  
 1 (pads present)

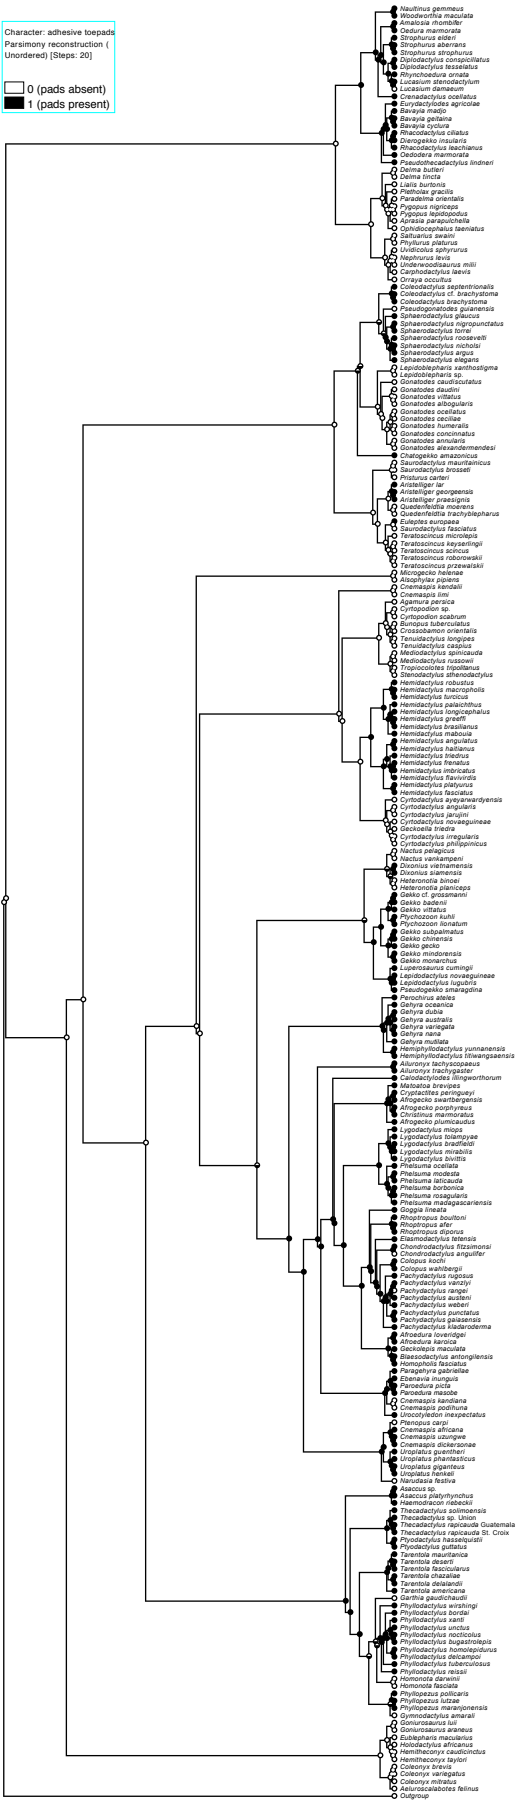

Supplement: pone.0039429.s005.pdf [file pone.0039429.s005.pdf]
