# Supplementary material for: Repeated Origin and Loss of Adhesive Toepads in Geckos
Source: PubMed Central journal article supplement (PMC3384654; doi:10.1371/journal.pone.0039429), 2012-06-27
Supplement: pone.0039429.s007.pdf [file pone.0039429.s007.pdf]

**Table S1. Details of material examined.** Family names abbreviated: E, Eublepharidae; D, Diplodactylidae; C, Carphodactylidae; Py, Pygopodidae; S, Sphaerodactylidae; Ph, Phyllodactylidae; G, Gekkonidae; and o, outgroups. Presence/absence of toepad morphologies are indicated. We used the following abbreviations: AMB, Aaron M. Bauer; AMCC, Ambrose Monell Cryo Collection, American Museum of Natural History; AMS, Australian Museum, Sydney; BPBM, Bernice P. Bishop Museum; BPN, Brice P. Noonan; CAS, California Academy of Sciences; CHUNB, Coleção Herpetológica da Universidade de Brasília; DB, Don Buden; ENS, Eric N. Smith; FG/MV, Frank Glaw and Miguel Vences; FGZC, Frank Glaw; FK, Fred Kraus; FLMNH, Florida Museum of Natural History; FMNH, Field Museum of Natural History; GVH, Gerald V Haagner; ID, Indraneil Das; JAC, Jonathan Campbell; JB, Jon Boone; JBL, Jonathan B. Losos - *Anolis* Genome Sequencing Project; JFBM, James Ford Bell Museum of Natural History, University of Minnesota; DJH, D. James Harris; JEM, John E. Measey; JS, Jay Sommers; JVV, Jens V. Vindum; KU, University of Kansas Museum of Natural History; LJAMM, Luciano J. Avila and Mariana Morando; LSHC, La Sierra University Herpetological Collection, L. Lee Grismer; LSUMZ, Louisiana State University Museum of Zoology; MCZ, Museum of Comparative Zoology, Harvard University; MF, Mike Forstner; MHNSM, Museo de Historia Natural, Universidad Nacional Mayor de San Marcos; MTSN, Trento Museum of Natural Sciences; MV, Museum of Victoria; MVZ, Museum of Vertebrate Zoology, Berkeley; MZUSP, Universidade de São Paulo, Museu de Zoologia; NMZ, National Museum of Zimbabwe; QM, Queensland Museum; PEM, Port Elizabeth Museum; RAH, Rod A. Hitchmough; RMB, Rafe M. Brown; ROM, Royal Ontario Museum; SAM, South Australian Museum; SC, Salvador Carranza; TG, Tony Gamble; WBJ, W. Bryan Jennings; WDH, Wulf D. Haacke; USNM, National Museum of Natural History, Smithsonian Institution; YPM, Yale Peabody Museum; ZCMV, Miguel Vences; ZFMK, Zoologisches Forschungsinstitut und Museum Alexander Koenig; ZSM, Zoologische Staatssammlung München.

| Family | Species                       | Toepads present | Leaf-toed morphology | Para-phalanges | ID          | Locality                                                        | RAG1     | RAG2     | C-MOS    | ACM4     | PDC      | ND2 + tRNAs |
|--------|-------------------------------|-----------------|----------------------|----------------|-------------|-----------------------------------------------------------------|----------|----------|----------|----------|----------|-------------|
| C      | <i>Carphodactylus laevis</i>  | No              | N/A                  | No             | AMS 143258  | Lamb Range, Queensland, Australia                               | EF534781 | EF534947 | EF534905 | EF534862 | EF534821 | GU459943    |
| C      | <i>Nephrurus levis</i>        | No              | N/A                  | No             | AMS 140561  | Western Australia, Australia                                    | GU459544 | JQ945487 | JQ945593 | JQ945700 | GU459746 | AY369018    |
| C      | <i>Orraya occultus</i>        | No              | N/A                  | No             | QM A002513  | Queensland, Australia                                           | JQ945320 | –        | –        | –        | JQ945388 | JX041389    |
| C      | <i>Phyllurus platurus</i>     | No              | N/A                  | No             | AMB 42      | Sydney, NSW, Australia                                          | HQ426314 | HQ426488 | HQ426570 | HQ426397 | HQ426226 | JX024357    |
| C      | <i>Saltuarius swaini</i>      | No              | N/A                  | No             | AMS 143262  | Lamb Range, Queensland, Australia                               | JQ945338 | JQ945509 | JQ945616 | JQ945722 | JQ945407 | JX024356    |
| C      | <i>Underwoodisaurus milii</i> | No              | N/A                  | No             | AMB 499     | Denham, Western Australia, Australia                            | EF534780 | EF534946 | EF534904 | EF534861 | EF534820 | JX041460    |
| C      | <i>Uvidicolus sphyrurus</i>   | No              | N/A                  | No             | AMS R152351 | Mt. Yulladunida, Kaputar Natl. Park, New South Wales, Australia | GU459543 | JQ945521 | JQ945627 | JQ945734 | GU459745 | GU459944    |
| D      | <i>Amalasia rhombifer</i>     | Yes             | Yes                  | No             | AMS 136216  | vic. Bells Creek, Queensland, Australia                         | JQ945319 | JQ945489 | JQ945595 | JQ945702 | JQ945387 | JX024363    |
| D      | <i>Bavayia cyclura</i>        | Yes             | No                   | No             | AMB 7683    | nr. Voh, New Caledonia                                          | HQ426264 | HQ426437 | HQ426521 | HQ426344 | HQ426176 | JX041315    |
| D      | <i>Bavayia geitaina</i>       | Yes             | No                   | No             | AMB 7229    | Mt. Ouin, New Caledonia                                         | JQ945285 | JQ945424 | JQ945532 | JQ945638 | JQ945353 | JX041316    |

| Family | Species                             | Toepads present | Leaf-toed morphology | Para-phalanges | ID          | Locality                                         | RAG1     | RAG2     | C-MOS    | ACM4     | PDC      | ND2 + tRNAs |
|--------|-------------------------------------|-----------------|----------------------|----------------|-------------|--------------------------------------------------|----------|----------|----------|----------|----------|-------------|
| D      | <i>Bavayia madjo</i>                | Yes             | No                   | No             | AMS R149329 | Mt. Panié, New Caledonia                         | JQ945286 | JQ945425 | JQ945533 | JQ945639 | JQ945354 | GU459950    |
| D      | <i>Crenadactylus ocellatus</i>      | Yes             | Yes                  | No             | AMS R162089 | Trephina Gorge, Northern Territory, Australia    | AY662627 | JQ945439 | FJ571641 | JQ945652 | JQ945367 | JX024364    |
| D      | <i>Dierogekko insularis</i>         | Yes             | No                   | No             | AMS R161069 | Ile Art, Belep Ids., New Caledonia               | JQ945306 | JQ945448 | JQ945555 | JQ945661 | JQ945375 | JF972458    |
| D      | <i>Diplodactylus conspicillatus</i> | Yes             | Yes                  | No             | AMS 158426  | Sturt Natl. Park, NSW, Australia                 | HQ426278 | HQ426451 | HQ426533 | HQ426358 | HQ426189 | JQ173628    |
| D      | <i>Diplodactylus tessellatus</i>    | Yes             | Yes                  | No             | AMS 143855  | Stonehenge area, Queensland, Australia           | JQ173725 | JQ945449 | JQ945556 | JQ945662 | JQ173677 | JQ173631    |
| D      | <i>Eurydactylodes agricolae</i>     | Yes             | No                   | No             | AMS R149366 | Mt. Panié, New Caledonia                         | GU459547 | JQ945453 | JQ945560 | JQ945666 | GU459749 | DQ533758    |
| D      | <i>Lucasium damaeum</i>             | No              | N/A                  | No             | AMB 54      | 58 km S Alice Springs, NT, Australia             | HQ426279 | HQ426452 | HQ426534 | HQ426359 | HQ426190 | GU459953    |
| D      | <i>Lucasium stenodactylum</i>       | Yes             | Yes                  | No             | AMS 139897  | El Questro Station, Western Australia, Australia | JQ173724 | JQ945477 | JQ945584 | JQ945690 | JQ173676 | JQ173630    |
| D      | <i>Naultinus gemmeus</i>            | Yes             | No                   | No             | RAH 464     | Hakataramea, New Zealand                         | GU459361 | JQ945486 | JQ945592 | JQ945699 | GU459563 | GU459764    |
| D      | <i>Oedodera marmorata</i>           | Yes             | No                   | No             | CAS 230936  | Paagoumène, New Caledonia                        | JQ945318 | JQ945488 | JQ945594 | JQ945701 | JQ945386 | GU459947    |
| D      | <i>Oedura marmorata</i>             | Yes             | Yes                  | No             | AMS 143861  | Stonehenge area, Queensland, Australia           | EF534779 | EF534945 | EF534903 | EF534860 | EF534819 | GU459951    |

| Family | Species                             | Toepads present | Leaf-toed morphology | Para-phalanges | ID         | Locality                                        | RAG1     | RAG2     | C-MOS    | ACM4     | PDC      | ND2 + tRNAs |
|--------|-------------------------------------|-----------------|----------------------|----------------|------------|-------------------------------------------------|----------|----------|----------|----------|----------|-------------|
| D      | <i>Pseudothecadactylus lindneri</i> | Yes             | No                   | No             | MVZ 99544  | Kakadu Natl. Park, NT, Australia                | HQ426318 | HQ426492 | HQ426573 | HQ426401 | HQ426230 | GU459946    |
| D      | <i>Rhacodactylus ciliatus</i>       | Yes             | No                   | No             | TG 00080   | New Caledonia                                   | –        | EF534944 | EF534902 | EF534859 | –        | –           |
| D      | <i>Rhacodactylus ciliatus</i>       | Yes             | No                   | No             | AMS 146595 | Rivière Bleue, New Caledonia                    | EF534778 | –        | –        | –        | EF534818 | JX024438    |
| D      | <i>Rhacodactylus leachianus</i>     | Yes             | No                   | No             | AMB 7189   | Ilot Moro, New Caledonia                        | GU459548 | JQ945505 | JQ945612 | JQ945718 | GU459750 | GU459949    |
| D      | <i>Rhynchoedura ornata</i>          | Yes             | Yes                  | No             | AMS 155371 | Sturt National Park, New South Wales, Australia | GU459553 | JQ945508 | JQ945615 | JQ945721 | GU459755 | GU459954    |
| D      | <i>Strophurus aberrans</i>          | Yes             | Yes                  | No             | AMS 136023 | Tanami Road, Western Australia, Australia       | JQ173761 | JQ945511 | –        | JQ945724 | JQ173715 | JQ173667    |
| D      | <i>Strophurus elderi</i>            | Yes             | Yes                  | No             | AMS 130987 | Silver City Hwy, New South Wales, Australia     | JQ173763 | JQ945512 | JQ945618 | JQ945725 | JQ173717 | JQ173669    |
| D      | <i>Strophurus strophurus</i>        | Yes             | Yes                  | No             | AMS 140536 | Denham, Western Australia, Australia            | JQ173766 | JQ945513 | JQ945619 | JQ945726 | JQ173720 | JQ173672    |
| D      | <i>Woodworthia maculata</i>         | Yes             | No                   | No             | RAH 292    | Titahi Bay, New Zealand                         | GU459449 | JQ945522 | JQ945628 | JQ945735 | GU459651 | GU459852    |
| E      | <i>Aeluroscalabotes felinus</i>     | No              | N/A                  | No             | JB 16      | Cameron Highlands, Malaysia                     | HQ426259 | HQ426432 | HQ426517 | HQ426338 | HQ426171 | JX041301    |
| E      | <i>Coleonyx brevis</i>              | No              | N/A                  | No             | TG 00194   | Hudspeth County, Texas, USA                     | HQ426271 | HQ426444 | HQ426528 | HQ426351 | HQ426182 | JX041333    |
| E      | <i>Coleonyx mitratus</i>            | No              | N/A                  | No             | TG 00075   | unknown                                         | HQ426272 | HQ426445 | HQ426529 | HQ426352 | HQ426183 | JX041334    |

| Family | Species                          | Toepads present | Leaf-toed morphology | Para-phalanges | ID          | Locality                                         | RAG1     | RAG2     | C-MOS    | ACM4     | PDC      | ND2 + tRNAs |
|--------|----------------------------------|-----------------|----------------------|----------------|-------------|--------------------------------------------------|----------|----------|----------|----------|----------|-------------|
| E      | <i>Coleonyx variegatus</i>       | No              | N/A                  | No             | CAS 205334  | Imperial Co., California, USA                    | EF534777 | EF534943 | EF534901 | EF534858 | EF534817 | JX041335    |
| E      | <i>Eublepharis macularius</i>    | No              | N/A                  | No             | JS 2        | Pakistan                                         | EF534776 | –        | –        | –        | EF534816 | JX041350    |
| E      | <i>Eublepharis macularius</i>    | No              | N/A                  | No             | TG 00081    | Pakistan                                         | –        | EF534942 | EF534900 | EF534857 | –        | –           |
| E      | <i>Goniurosaurus araneus</i>     | No              | N/A                  | No             | JFBM 15830  | Vietnam                                          | HQ426286 | HQ426455 | HQ426537 | HQ426362 | HQ426197 | JX041364    |
| E      | <i>Goniurosaurus luii</i>        | No              | N/A                  | No             | TG 00795    | China                                            | HQ426287 | HQ426456 | HQ426538 | HQ426363 | HQ426198 | JX041365    |
| E      | <i>Hemitheconyx caudicinctus</i> | No              | N/A                  | No             | TG 00180    | unknown                                          | HQ426294 | HQ426468 | HQ426552 | HQ426377 | HQ426205 | JX041370    |
| E      | <i>Hemitheconyx taylori</i>      | No              | N/A                  | No             | JB 12       | Somalia                                          | HQ426295 | HQ426469 | HQ426553 | HQ426378 | HQ426206 | JX041371    |
| E      | <i>Holodactylus africanus</i>    | No              | N/A                  | No             | CAS 198845  | Kajiado District, Kenya                          | HQ426296 | HQ426470 | HQ426554 | HQ426379 | HQ426207 | JX041372    |
| G      | <i>Afroedura karroica</i>        | Yes             | Yes                  | Yes            | PEM FN1112  | Eastern Cape Province, South Africa              | JQ945277 | JQ945415 | JQ945523 | JQ945629 | JQ945345 | JX041302    |
| G      | <i>Afroedura loveridgei</i>      | Yes             | Yes                  | Yes            | GVH 3969    | Mozambique                                       | JQ945278 | JQ945416 | JQ945524 | JQ945630 | JQ945346 | JX041303    |
| G      | <i>Afrogecko plumicaudus</i>     | Yes             | Yes                  | No             | WDH 1       | Parque Nacional do Iona, Cunene Prov., Angola    | JQ945279 | JQ945417 | JQ945525 | JQ945631 | JQ945347 | JX041304    |
| G      | <i>Afrogecko porphyreus</i>      | Yes             | Yes                  | No             | CAS 206995  | Cape Hangklip, Western Cape Prov., South Africa  | EF490723 | JQ945418 | JQ945526 | JQ945632 | EF490697 | EF490776    |
| G      | <i>Afrogecko swartbergensis</i>  | Yes             | Yes                  | No             | JB 47       | Swartberg Mts., Western Cape Prov., South Africa | JQ945280 | JQ945419 | JQ945527 | JQ945633 | JQ945348 | JX041305    |
| G      | <i>Agamura persica</i>           | No              | N/A                  | No             | FMNH 247474 | Makran Dist., Baluchistan,                       | JQ945281 | JQ945420 | JQ945528 | JQ945634 | JQ945349 | JX041306    |

| Family | Species                               | Toepads present | Leaf-toed morphology | Para-phalanges | ID           | Locality                                                      | RAG1     | RAG2     | C-MOS    | ACM4     | PDC      | ND2 + tRNAs |
|--------|---------------------------------------|-----------------|----------------------|----------------|--------------|---------------------------------------------------------------|----------|----------|----------|----------|----------|-------------|
|        |                                       |                 |                      |                |              | Pakistan                                                      |          |          |          |          |          |             |
| G      | <i>Ailuronyx tachyscopaeus</i>        | Yes             | No                   | No             | MCZ F38717   | Silhouette Island, Seychelles                                 | JQ945282 | JQ945421 | JQ945529 | JQ945635 | JQ945350 | JX041307    |
| G      | <i>Ailuronyx trachygaster</i>         | Yes             | No                   | No             | AMB 8160     | Silhouette Island, Seychelles                                 | JQ945283 | JQ945422 | JQ945530 | JQ945636 | JQ945351 | JX041308    |
| G      | <i>Alsophylax pipiens</i>             | No              | N/A                  | No             | CAS 238805   | Bulgan, Khovd, Mongolia                                       | JQ945284 | JQ945423 | JQ945531 | JQ945637 | JQ945352 | JX041309    |
| G      | <i>Blaesodactylus antongilensis</i>   | Yes             | No                   | Yes            | ZSM 410/2005 | Nosy Mangabe, Toamasina Prov., Madagascar                     | EU054229 | JQ945426 | JQ945534 | JQ945640 | EU054205 | EU054253    |
| G      | <i>Bunopus tuberculatus</i>           | No              | N/A                  | No             | CAS 228737   | Sharjah, United Arab Emirates                                 | JQ945287 | JQ945427 | JQ945535 | JQ945641 | JQ945355 | JX041317    |
| G      | <i>Calodactylodes illingworthorum</i> | Yes             | Yes                  | Yes            | AMB7415      | Serawa, Pitakumbura, Sri Lanka                                | JQ945288 | JQ945428 | JQ945536 | JQ945642 | JQ945356 | JX041318    |
| G      | <i>Chondrodactylus angulifer</i>      | No              | N/A                  | No             | MCZ R184984  | Klein Aus Vista, Namibia                                      | JQ945289 | JQ945429 | JQ945537 | JQ945643 | JQ945357 | –           |
| G      | <i>Chondrodactylus angulifer</i>      | No              | N/A                  | No             | AMB 4669     | Richtersveld National Park, Northern Cape Prov., South Africa | –        | –        | –        | –        | –        | JX041320    |
| G      | <i>Chondrodactylus fitsimensi</i>     | Yes             | No                   | No             | CAS 193884   | 30 km N Swakopmund, Namibia                                   | EU293645 | EU293735 | EU293690 | EU293667 | EU293712 | JX041321    |
| G      | <i>Christinus marmoratus</i>          | Yes             | Yes                  | No             | AMS 135338   | Wirralie, Ladysmith, New South Wales, Australia               | JQ945290 | JQ945430 | JQ945538 | JQ945644 | JQ945358 | JX041322    |

| Family | Species                        | Toepads present | Leaf-toed morphology | Para-phalanges | ID          | Locality                                            | RAG1     | RAG2     | C-MOS    | ACM4     | PDC      | ND2 + tRNAs |
|--------|--------------------------------|-----------------|----------------------|----------------|-------------|-----------------------------------------------------|----------|----------|----------|----------|----------|-------------|
| G      | <i>Cnemaspis africana</i>      | Yes             | No                   | No             | FMNH 251355 | Amani, Tanga, Tanzania                              | –        | JQ945431 | JQ945539 | JQ945645 | –        | –           |
| G      | <i>Cnemaspis africana</i>      | Yes             | No                   | No             | CAS 168872  | Amani, Tanga, Tanzania                              | JQ945291 | –        | –        | –        | JQ945359 | JX041323    |
| G      | <i>Cnemaspis dickersonae</i>   | Yes             | No                   | No             | MTSN 8604   | Uzungwa Scarp, Tanzania                             | JQ945292 | JQ945432 | JQ945540 | JQ945646 | JQ945360 | JX041324    |
| G      | <i>Cnemaspis kandiana</i>      | No              | N/A                  | No             | AMB 7508    | Masimbula, Godakawela, Sri Lanka                    | JQ945293 | JQ945433 | JQ945541 | JQ945647 | JQ945361 | JX041325    |
| G      | <i>Cnemaspis kendalii</i>      | No              | N/A                  | No             | LSHC 6562   | Kepong, Selangor, Malaysia                          | JQ945294 | JQ945434 | JQ945542 | –        | JQ945362 | JX041326    |
| G      | <i>Cnemaspis limi</i>          | No              | N/A                  | No             | LSHC 6267   | Pulau Tioman, Malaysia                              | EF534809 | EF534977 | EF534935 | EF534892 | EF534851 | JX041327    |
| G      | <i>Cnemaspis podihuna</i>      | No              | N/A                  | No             | AMB 7449    | Mihintale, Sri Lanka                                | JQ945295 | JQ945435 | JQ945543 | JQ945648 | JQ945363 | JX041328    |
| G      | <i>Cnemaspis uzungwe</i>       | Yes             | No                   | No             | MTSN 5603   | Chita, Uzungwe Scarp, Tanzania                      | JQ945296 | JQ945436 | JQ945544 | JQ945649 | JQ945364 | JX041329    |
| G      | <i>Colopus kochi</i>           | Yes             | No                   | No             | CAS 214308  | 59 km N Swakopmund, Namibia                         | JQ945297 | JQ945437 | JQ945545 | JQ945650 | JQ945365 | JX041336    |
| G      | <i>Colopus wahlbergii</i>      | Yes             | No                   | No             | NMZ 16974   | Kalamba Station, Kazungula Dist., Zambia            | JQ945298 | JQ945438 | JQ945546 | JQ945651 | JQ945366 | JX041337    |
| G      | <i>Crossobamon orientalis</i>  | No              | N/A                  | No             | ID 7618     | vic. Sam, Rajasthan, India                          | JQ945299 | JQ945440 | JQ945547 | JQ945653 | JQ945368 | JX041338    |
| G      | <i>Cryptactites peringueyi</i> | Yes             | Yes                  | No             | CAS 186374  | Krom River Estuary, Easter Cape Prov., South Africa | JQ945300 | JQ945441 | JQ945548 | JQ945654 | JQ945369 | JX041339    |

| Family | Species                              | Toepads present | Leaf-toed morphology | Para-phalanges | ID          | Locality                                              | RAG1     | RAG2     | C-MOS    | ACM4     | PDC      | ND2 + tRNAs |
|--------|--------------------------------------|-----------------|----------------------|----------------|-------------|-------------------------------------------------------|----------|----------|----------|----------|----------|-------------|
| G      | <i>Cyrtodactylus angularis</i>       | No              | N/A                  | No             | FMNH 265815 | Muang Sa Kaeo, Sa Kaeo, Thailand                      | JQ945301 | JQ945442 | JQ945549 | JQ945655 | JQ945370 | JX041340    |
| G      | <i>Cyrtodactylus ayeyarwadyensis</i> | No              | N/A                  | No             | CAS 216446  | Rakhine, Myanmar                                      | EU268287 | JQ945443 | JQ945550 | JQ945656 | EU268317 | EU268348    |
| G      | <i>Cyrtodactylus irregularis</i>     | No              | N/A                  | No             | FMNH 258697 | Pakxong Dist., Champasak Prov., Lao PDR               | JQ945302 | JQ945444 | JQ945551 | JQ945657 | JQ945371 | JX041341    |
| G      | <i>Cyrtodactylus jarujini</i>        | No              | N/A                  | No             | FMNH 255472 | Thaphabat Dist., Bolikhamxay Prov., Lao PDR           | JQ945303 | JQ945445 | JQ945552 | JQ945658 | JQ945372 | JX041342    |
| G      | <i>Cyrtodactylus novaeguineae</i>    | No              | N/A                  | No             | FK 11689    | West Sepik, Papua New Guinea                          | HQ426274 | HQ426447 | HQ426531 | HQ426354 | HQ426185 | JX041343    |
| G      | <i>Cyrtodactylus philippinicus</i>   | No              | N/A                  | No             | FMNH 236073 | Mt. Guitinguitin, Sibuyan Island, Philippines         | JQ945304 | JQ945446 | JQ945553 | JQ945659 | JQ945373 | JX041344    |
| G      | <i>Cyrtopodion scabrum</i>           | No              | N/A                  | No             | TG 00109    | Egypt                                                 | HQ426275 | HQ426448 | HQ426532 | HQ426355 | HQ426186 | JX041345    |
| G      | <i>Cyrtopodion</i> sp.               | No              | N/A                  | No             | FMNH 256409 | Karakar Pass, Swat Dist., NW Frontier Prov., Pakistan | JQ945305 | JQ945447 | JQ945554 | JQ945660 | JQ945374 | JX041346    |
| G      | <i>Dixonius siamensis</i>            | No              | N/A                  | No             | LSHC 7328   | Phnom Aural, Pursat Prov., Cambodia                   | EU054283 | JQ945450 | JQ945557 | JQ945663 | EU054267 | EU054299    |
| G      | <i>Dixonius vietnamensis</i>         | No              | N/A                  | No             | FMNH 263003 | Keo Seima Dist., Mondolkiri Prov., Cambodia           | EU054281 | JQ945451 | JQ945558 | JQ945664 | EU054265 | EU054297    |



| Family | Species                        | Toepads present | Leaf-toed morphology | Para-phalanges | ID         | Locality                                                     | RAG1     | RAG2     | C-MOS    | ACM4     | PDC      | ND2 + tRNAs |
|--------|--------------------------------|-----------------|----------------------|----------------|------------|--------------------------------------------------------------|----------|----------|----------|----------|----------|-------------|
| G      | <i>Ebenavia inunguis</i>       | Yes             | Yes                  | No             | ZCMV 2099  | Marojejy, Madagascar                                         | HQ426280 | HQ426453 | HQ426535 | HQ426360 | HQ426191 | JX041348    |
| G      | <i>Elasmodactylus tetensis</i> | Yes             | No                   | No             | PEM 5551   | Niassa Game Reserve, Mozambique                              | JQ945307 | JQ945452 | JQ945559 | JQ945665 | JQ945376 | JX041349    |
| G      | <i>Geckoella triedra</i>       | No              | N/A                  | No             | 35A        | Sri Lanka                                                    | JQ945308 | JQ945454 | JQ945561 | JQ945667 | JQ945377 | JX041352    |
| G      | <i>Geckolepis maculata</i>     | Yes             | No                   | Yes            | FGZC 463   | Montagne d'Ambre, Madagascar                                 | EU054211 | JQ945455 | JQ945562 | JQ945668 | EU054187 | EU054235    |
| G      | <i>Gehyra australis</i>        | Yes             | No                   | Yes            | AMS 139934 | El Questro Station, Western Australia, Australia             | JN019145 | JQ945456 | JQ945563 | JQ945669 | JN019113 | JN019081    |
| G      | <i>Gehyra cf. oceanica</i>     | Yes             | No                   | Yes            | BPBM 23349 | Parkop, Toricelli Mts., West Sepik Prov., Papua New Guinea   | JQ945309 | JQ945457 | JQ945564 | JQ945670 | JN394000 | JN393922    |
| G      | <i>Gehyra dubia</i>            | Yes             | No                   | Yes            | AMS 152245 | Daydawn, New South Wales, Australia                          | JN393956 | JQ945458 | JQ945565 | JQ945671 | JN393989 | JN393911    |
| G      | <i>Gehyra mutilata</i>         | Yes             | No                   | Yes            | JFBM 15819 | unknown                                                      | –        | JQ945459 | JQ945566 | JQ945672 | –        | –           |
| G      | <i>Gehyra mutilata</i>         | Yes             | No                   | Yes            | AMB 6582   | Penang, Malaysia                                             | JN393962 | –        | –        | –        | JN393995 | JN393917    |
| G      | <i>Gehyra nana</i>             | Yes             | No                   | Yes            | AMS 140070 | McGowens Beach, Kalumburu area, Western Australia, Australia | JN393963 | JQ945460 | JQ945567 | JQ945673 | JN393996 | JN393918    |

| Family | Species                     | Toepads present | Leaf-toed morphology | Para-phalanges | ID         | Locality                                                                                          | RAG1     | RAG2     | C-MOS    | ACM4     | PDC      | ND2 + tRNAs |
|--------|-----------------------------|-----------------|----------------------|----------------|------------|---------------------------------------------------------------------------------------------------|----------|----------|----------|----------|----------|-------------|
| G      | <i>Gehyra variegata</i>     | Yes             | No                   | Yes            | AMS 140478 | Millstream, Western Australia, Australia                                                          | JN393973 | JQ945461 | JQ945568 | JQ945674 | JN394007 | JN393929    |
| G      | <i>Gekko badenii</i>        | Yes             | No                   | No             | TG 00095   | Vietnam                                                                                           | –        | JQ945462 | JQ945569 | JQ945675 | –        | –           |
| G      | <i>Gekko badenii</i>        | Yes             | No                   | No             | JB 13      | Vietnam                                                                                           | JN019130 | –        | –        | –        | JN019099 | JN019065    |
| G      | <i>Gekko cf. grossmanni</i> | Yes             | No                   | No             | No ID      | unknown                                                                                           | JN019129 | JQ945463 | JQ945570 | JQ945676 | JN019098 | JN019064    |
| G      | <i>Gekko chinensis</i>      | Yes             | No                   | No             | LSHC 4209  | Wuzhi Shan, Hainan Id., China                                                                     | JN019123 | JQ945464 | JQ945571 | JQ945677 | JN019092 | JN019058    |
| G      | <i>Gekko gecko</i>          | Yes             | No                   | No             | No ID      | unknown                                                                                           | EF534813 | –        | –        | –        | EF534854 | EU054288    |
| G      | <i>Gekko gecko</i>          | Yes             | No                   | No             | TG 00079   | Indonesia<br>Barangay Formon, Sitio Balogbob, Cueba Simbahan, Mindoro Oriental Prov., Philippines | –        | EF534981 | EF534939 | EF534896 | –        | –           |
| G      | <i>Gekko mindorensis</i>    | Yes             | No                   | No             | KU 303912  | Philippines                                                                                       | JN019140 | JQ945465 | JQ945572 | JQ945678 | JN019108 | JN019076    |
| G      | <i>Gekko monarchus</i>      | Yes             | No                   | No             | PEM R5412  | Port Elizabeth, Eastern Cape, South Africa                                                        | JN019141 | JQ945466 | JQ945573 | JQ945679 | JN019109 | JN019077    |
| G      | <i>Gekko subpalmatus</i>    | Yes             | No                   | No             | AMB 6567   | Chengdu, Sichuan, China                                                                           | JN019128 | JQ945467 | JQ945574 | JQ945680 | JN019097 | JN019063    |
| G      | <i>Gekko vittatus</i>       | Yes             | No                   | No             | BPBM 19780 | Rossel Id., Louisiade Ids., Milne Bay Prov., Papua New Guinea                                     | JN019134 | JQ945468 | JQ945575 | JQ945681 | JN019102 | JN019069    |

| Family | Species                           | Toepads present | Leaf-toed morphology | Para-phalanges | ID          | Locality                                                      | RAG1     | RAG2     | C-MOS    | ACM4     | PDC      | ND2 + tRNAs |
|--------|-----------------------------------|-----------------|----------------------|----------------|-------------|---------------------------------------------------------------|----------|----------|----------|----------|----------|-------------|
| G      | <i>Goggia lineata</i>             | Yes             | Yes                  | No             | AMB4762     | Richtersveld National Park, Northern Cape Prov., South Africa | JQ945310 | JQ945469 | JQ945576 | JQ945682 | JQ945378 | JX041353    |
| G      | <i>Hemidactylus angulatus</i>     | Yes             | No                   | Yes            | MVZ 245438  | Togo Hills, Nkwanta, Ghana                                    | EU268306 | –        | HQ426540 | HQ426365 | EU268336 | EU268367    |
| G      | <i>Hemidactylus brasilianus</i>   | Yes             | No                   | Yes            | MZUSP 92493 | Parque Nacional da Serra das Confusões, Piauí, Brazil         | EU268290 | HQ426439 | HQ426523 | HQ426346 | EU268320 | EU268351    |
| G      | <i>Hemidactylus fasciatus</i>     | Yes             | No                   | Yes            | ROM 19891   | Sapo Nat'l Park, Sinoe, Liberia                               | JQ945311 | JQ945470 | JQ945577 | JQ945683 | JQ945379 | EU268371    |
| G      | <i>Hemidactylus flaviviridis</i>  | Yes             | No                   | Yes            | FMNH 245515 | Punjab Province, Pakistan                                     | EU268294 | HQ426458 | HQ426541 | HQ426366 | EU268324 | EU268355    |
| G      | <i>Hemidactylus frenatus</i>      | Yes             | No                   | Yes            | TG 00088    | Indonesia                                                     | –        | EF534982 | EF534940 | EF534897 | –        | –           |
| G      | <i>Hemidactylus frenatus</i>      | Yes             | No                   | Yes            | AMB 7411    | Pidenipitiya, Sri Lanka                                       | EF534814 | –        | –        | –        | EF534855 | EU268357    |
| G      | <i>Hemidactylus greeffi</i>       | Yes             | No                   | Yes            | CAS 219044  | Praia da Mutamba, Sao Tomé                                    | EU268308 | HQ426459 | HQ426542 | HQ426367 | EU268338 | EU268369    |
| G      | <i>Hemidactylus haitianus</i>     | Yes             | No                   | Yes            | CAS 198443  | nr. Santo Domingo, Dominican Republic                         | HM559700 | –        | HQ426543 | HQ426368 | HM559667 | HM559634    |
| G      | <i>Hemidactylus imbricatus</i>    | Yes             | No                   | Yes            | TG 00568    | Pakistan                                                      | HM559703 | HQ426506 | HQ426587 | HQ426416 | HM559670 | EU268354    |
| G      | <i>Hemidactylus longicephalus</i> | Yes             | No                   | Yes            | CAS 218939  | Lagoa Azul, Sao Tomé                                          | HQ426289 | HQ426460 | HQ426544 | HQ426369 | HQ426200 | HM559637    |
| G      | <i>Hemidactylus</i>               | Yes             | No                   | Yes            | JEM 1864    | Wundanyi,                                                     | HQ426291 | HQ426462 | HQ426546 | HQ426371 | HQ426202 | JX041368    |

| Family | Species                                   | Toepads present | Leaf-toed morphology | Para-phalanges | ID            | Locality                                                                              | RAG1     | RAG2     | C-MOS    | ACM4     | PDC      | ND2 + tRNAs |
|--------|-------------------------------------------|-----------------|----------------------|----------------|---------------|---------------------------------------------------------------------------------------|----------|----------|----------|----------|----------|-------------|
|        | <i>mabouia</i>                            |                 |                      |                |               |                                                                                       |          |          |          |          |          |             |
| G      | <i>Hemidactylus macropholis</i>           | Yes             | No                   | Yes            | CAS 227520    | Kenya<br>Bari Region,<br>Puntland State,<br>Somalia                                   | HQ426292 | HQ426463 | HQ426547 | HQ426372 | HQ426203 | JX041369    |
| G      | <i>Hemidactylus palaichthus</i>           | Yes             | No                   | Yes            | LSUMZ H-12421 | Roraima,<br>Brazil                                                                    | EU268307 | HQ426464 | HQ426548 | HQ426373 | EU268337 | EU268368    |
| G      | <i>Hemidactylus platyurus</i>             | Yes             | No                   | Yes            | JFBM 15815    | unknown                                                                               | HQ426273 | HQ426446 | HQ426530 | HQ426353 | HQ426184 | –           |
| G      | <i>Hemidactylus platyurus</i>             | Yes             | No                   | Yes            | KU30411       | Lubang,<br>Philippines<br>Makran<br>District,<br>Baluchistan<br>Province,<br>Pakistan | –        | –        | –        | –        | –        | EU268352    |
| G      | <i>Hemidactylus robustus</i>              | Yes             | No                   | Yes            | FMNH 245519   | India                                                                                 | HM559715 | HQ426466 | HQ426550 | HQ426375 | HM559682 | HM559649    |
| G      | <i>Hemidactylus triedrus</i>              | Yes             | No                   | Yes            | JB 09         | Gainesville,<br>Alachua<br>County,<br>Florida, USA                                    | HQ426293 | HQ426467 | HQ426551 | HQ426376 | HQ426204 | –           |
| G      | <i>Hemidactylus turcicus</i>              | Yes             | No                   | Yes            | TG 00567      | Baton Rouge,<br>Louisiana,<br>USA                                                     | –        | –        | –        | –        | –        | EU268360    |
| G      | <i>Hemidactylus turcicus</i>              | Yes             | No                   | Yes            | LSUMZ 1981    | Cameron<br>Highlands,<br>Pahang,<br>Malaysia                                          | JN393978 | JQ945471 | JQ945578 | JQ945684 | JN394012 | JN393934    |
| G      | <i>Hemiphyllodactylus titiwangsaensis</i> | Yes             | No                   | Yes            | LSHC 7208     | Pakxong Dist.,<br>Champasak<br>Prov., Lao<br>PDR                                      | JN393979 | JQ945472 | JQ945579 | JQ945685 | JN394013 | JN393935    |
| G      | <i>Hemiphyllodactylus yunnanensis</i>     | Yes             | No                   | Yes            | FMNH 258695   | Sturt Natl.<br>Park, New<br>South Wales,                                              | EU054285 | JQ945473 | JQ945580 | JQ945686 | EU054269 | EU054301    |

| Family | Species                            | Toepads present | Leaf-toed morphology | Para-phalanges | ID             | Locality                                                                                 | RAG1     | RAG2     | C-MOS    | ACM4     | PDC      | ND2 + tRNAs |
|--------|------------------------------------|-----------------|----------------------|----------------|----------------|------------------------------------------------------------------------------------------|----------|----------|----------|----------|----------|-------------|
|        |                                    |                 |                      |                |                | Australia                                                                                |          |          |          |          |          |             |
| G      | <i>Heteronotia planiceps</i>       | No              | N/A                  | No             | AMS 140331     | 23.3 km NNW jct. Tunnel Creek RD. with Great Northern Hwy., Western Australia, Australia | EU054284 | JQ945474 | JQ945581 | JQ945687 | EU054268 | EU054300    |
| G      | <i>Homopholis fasciatus</i>        | Yes             | No                   | Yes            | TG 00191       | unknown                                                                                  | EU054226 | JQ945475 | JQ945582 | JQ945688 | EU054202 | EU054250    |
| G      | <i>Lepidodactylus lugubris</i>     | Yes             | No                   | No             | AMB 4111       | Kirimati, Kiribati                                                                       | EF534812 | EF534980 | EF534938 | EF534895 | EF534853 | JX041377    |
| G      | <i>Lepidodactylus novaeguineae</i> | Yes             | No                   | No             | BPBM 15842     | Boiaboaiwaga Id., Milne Bay Prov., Papua New Guinea                                      | JQ945312 | JQ945476 | JQ945583 | JQ945689 | JQ945380 | JX041378    |
| G      | <i>Luperosaurus cumingii</i>       | Yes             | No                   | No             | RMB 3546       | Cumiagi, Philippines                                                                     | JQ945313 | JQ945478 | JQ945585 | JQ945691 | JQ945381 | JX041379    |
| G      | <i>Lygodactylus bivittis</i>       | Yes             | No                   | Yes            | FG/MV 2001.A21 | Andasibe, Madagascar 63.5 km W Kamanjab,                                                 | JQ945314 | JQ945479 | JQ945586 | JQ945692 | JQ945382 | JX041380    |
| G      | <i>Lygodactylus bradfieldi</i>     | Yes             | No                   | Yes            | AMB 7628       | Kunene Region, Namibia                                                                   | HQ426301 | HQ426474 | HQ426558 | HQ426383 | HQ426212 | JX041381    |
| G      | <i>Lygodactylus miops</i>          | Yes             | No                   | Yes            | ZSM 116/2004   | Andohahela, Madagascar                                                                   | HQ426299 | HQ426472 | HQ426556 | HQ426381 | HQ426210 | –           |
| G      | <i>Lygodactylus mirabilis</i>      | Yes             | No                   | Yes            | FG/MV 2000.B3  | Madagascar                                                                               | HQ426300 | HQ426473 | HQ426557 | HQ426382 | HQ426211 | JX041382    |
| G      | <i>Lygodactylus tolampyae</i>      | Yes             | No                   | Yes            | FG/MV 2001.C14 | Ankarafantsika, Madagascar                                                               | HQ426302 | HQ426475 | HQ426559 | HQ426384 | HQ426213 | JX041383    |

| Family | Species                           | Toepads present | Leaf-toed morphology | Paraphalanges | ID                 | Locality                                                 | RAG1     | RAG2     | C-MOS    | ACM4     | PDC      | ND2 + tRNAs |
|--------|-----------------------------------|-----------------|----------------------|---------------|--------------------|----------------------------------------------------------|----------|----------|----------|----------|----------|-------------|
| G      | <i>Matoatoa brevipes</i>          | Yes             | Yes                  | No            | FG/MV<br>2002.2237 | Tulear area,<br>Madagascar                               | EF490724 | JQ945480 | JQ945587 | JQ945693 | EF490698 | EF490777    |
| G      | <i>Mediodactylus russowii</i>     | No              | N/A                  | No            | AMB 8701           | unknown                                                  | JQ945315 | JQ945481 | JQ945588 | JQ945694 | JQ945383 | JX041384    |
| G      | <i>Mediodactylus spinicauda</i>   | No              | N/A                  | No            | CAS<br>228709      | Birjand,<br>Khorasan<br>Prov., Iran                      | JQ945316 | JQ945482 | JQ945589 | JQ945695 | JQ945384 | JX041385    |
| G      | <i>Microgecko helenae</i>         | No              | N/A                  | No            | JB 27              | unknown                                                  | JQ945317 | JQ945483 | JQ945590 | JQ945696 | JQ945385 | JX041386    |
| G      | <i>Nactus pelagicus</i>           | No              | N/A                  | No            | CAS<br>229289      | Mt. Gouémba,<br>New Caledonia                            | EU054275 | JQ945484 | –        | JQ945697 | EU054259 | EU054291    |
| G      | <i>Nactus vankampeni</i>          | No              | N/A                  | No            | FK11384            | Wewak, East<br>Sepik Prov.,<br>Papua New<br>Guinea       | EU054279 | JQ945485 | JQ945591 | JQ945698 | EU054263 | EU054295    |
| G      | <i>Narudasia festiva</i>          | No              | N/A                  | No            | AMB 3243           | Narudas,<br>Namibia                                      | EF534808 | EF534976 | EF534934 | EF534891 | EF534850 | JX041387    |
| G      | <i>Pachydactylus austeni</i>      | Yes             | No                   | No            | AMB 3295           | Port Nolloth,<br>Northern Cape<br>Prov., South<br>Africa | JQ945321 | –        | JQ945596 | JQ945703 | JQ945389 | JX041390    |
| G      | <i>Pachydactylus gaiasensis</i>   | Yes             | No                   | No            | AMB 7596           | Gai-As,<br>Namibia                                       | JQ945322 | JQ945490 | JQ945597 | JQ945704 | JQ945390 | JX041391    |
| G      | <i>Pachydactylus kladaroderma</i> | Yes             | No                   | No            | PEM<br>FN1253      | Molteno Pass,<br>Western Cape<br>Prov., South<br>Africa  | JQ945323 | JQ945491 | JQ945598 | JQ945705 | JQ945391 | JX041392    |
| G      | <i>Pachydactylus punctatus</i>    | Yes             | No                   | No            | MCZ<br>R184457     | Farm Celine,<br>Limpopo Prov.,<br>South Africa           | EU293646 | –        | –        | –        | EU293713 | JX041393    |
| G      | <i>Pachydactylus punctatus</i>    | Yes             | No                   | No            | MCZ<br>R184458     | Farm Celine,<br>Limpopo Prov.,<br>South Africa           | –        | EU293736 | EU293691 | EU293668 | –        | –           |
| G      | <i>Pachydactylus rangei</i>       | Yes             | No                   | Yes           | MCZ<br>R183725     | Swakop River,<br>Namibia                                 | JQ945324 | JQ945492 | JQ945599 | –        | JQ945392 | JX041394    |

| Family | Species                      | Toepads present | Leaf-toed morphology | Para-phalanges | ID            | Locality                                                                      | RAG1     | RAG2     | C-MOS    | ACM4     | PDC      | ND2 + tRNAs |
|--------|------------------------------|-----------------|----------------------|----------------|---------------|-------------------------------------------------------------------------------|----------|----------|----------|----------|----------|-------------|
| G      | <i>Pachydactylus rugosus</i> | Yes             | No                   | No             | CAS 201905    | Sendelingsdrif, Richtersveld National Park, Northern Cape Prov., South Africa | JQ945325 | JQ945493 | JQ945600 | JQ945706 | JQ945393 | JX041395    |
| G      | <i>Pachydactylus vanzlyi</i> | Yes             | No                   | Yes            | JVV 1761      | Munutum River, Namibia                                                        | JQ945326 | JQ945494 | JQ945601 | JQ945707 | JQ945394 | JX041396    |
| G      | <i>Pachydactylus weberi</i>  | Yes             | No                   | No             | PEM R12449    | 1.4 km S Dawis, Richtersveld, Northern Cape Prov., South Africa               | JQ945327 | JQ945495 | JQ945602 | JQ945708 | JQ945395 | JX041397    |
| G      | <i>Paragehyra gabriellae</i> | Yes             | No                   | No             | FGZC 2366     | Grotte Ampasy, Madagascar                                                     | JQ945328 | JQ945496 | JQ945603 | JQ945709 | JQ945396 | JX041399    |
| G      | <i>Paroedura masobe</i>      | Yes             | Yes                  | No             | JFBM 15832    | Madagascar                                                                    | EF536145 | HQ426478 | HQ426560 | HQ426387 | EF536169 | EF536193    |
| G      | <i>Paroedura picta</i>       | Yes             | Yes                  | No             | FG/MV 2002.B1 | Berenty, Madagascar                                                           | EF536149 | EU293737 | EU293692 | EU293669 | EF536173 | EF536197    |
| G      | <i>Perochirus ateles</i>     | Yes             | No                   | Yes            | DB Dmale      | Dehpelhi Id., Pohnpei, Federated States of Micronesia                         | JN393984 | JQ945497 | JQ945604 | JQ945710 | JN393946 | JN393938    |
| G      | <i>Phelsuma borbonica</i>    | Yes             | No                   | No             | JB 95         | Réunion                                                                       | HQ426305 | HQ426479 | HQ426561 | HQ426388 | HQ426216 | JX041400    |
| G      | <i>Phelsuma laticauda</i>    | Yes             | No                   | No             | TG 00232      | Oahu, Hawaii                                                                  | –        | JQ945498 | JQ945605 | JQ945711 | –        | –           |
| G      | <i>Phelsuma laticauda</i>    | Yes             | No                   | No             | FGZC 2705     | Antalaha Airport, Madagascar                                                  | JQ945329 | –        | –        | –        | JQ945398 | JX041401    |

| Family | Species                             | Toepads present | Leaf-toed morphology | Para-phalanges | ID                | Locality                                                                            | RAG1     | RAG2     | C-MOS    | ACM4     | PDC      | ND2 + tRNAs |
|--------|-------------------------------------|-----------------|----------------------|----------------|-------------------|-------------------------------------------------------------------------------------|----------|----------|----------|----------|----------|-------------|
| G      | <i>Phelsuma madagascariensis</i>    | Yes             | No                   | No             | FG/MV<br>2002.797 | Manongarivo,<br>Madagascar                                                          | EF534811 | EF534979 | EF534937 | EF534894 | AB081507 | JX041402    |
| G      | <i>Phelsuma modesta</i>             | Yes             | No                   | No             | ZSM<br>35/2004    | Ambovombe,<br>Madagascar<br>22 km E                                                 | HQ426307 | HQ426481 | HQ426563 | HQ426390 | HQ426218 | JX041403    |
| G      | <i>Phelsuma ocellata</i>            | Yes             | No                   | No             | CAS<br>186351     | Sendelingsdrif,<br>Richtersveld<br>National Park,<br>Northern Cape,<br>South Africa | HQ426308 | HQ426482 | HQ426564 | HQ426391 | HQ426219 | JX041429    |
| G      | <i>Phelsuma rosagularis</i>         | Yes             | No                   | No             | JB 109            | Mauritius                                                                           | HQ426306 | HQ426480 | HQ426562 | HQ426389 | HQ426217 | JX041404    |
| G      | <i>Pseudogecko smaragdina</i>       | Yes             | No                   | No             | KU 303995         | Quezon,<br>Philippines<br>20 km N                                                   | JQ945332 | JQ945501 | JQ945608 | JQ945714 | JQ945401 | JX041420    |
| G      | <i>Ptenopus carpi</i>               | No              | N/A                  | No             | CAS<br>214534     | Swakopmund,<br>Namibia                                                              | JQ945333 | JQ945502 | JQ945609 | JQ945715 | JQ945402 | JX041422    |
| G      | <i>Ptychozoon kuhli</i>             | Yes             | No                   | No             | RMB 1134          | Malaysia                                                                            | JQ945334 | JQ945503 | JQ945610 | JQ945716 | JQ945403 | JX041423    |
| G      | <i>Ptychozoon lionatum</i>          | Yes             | No                   | No             | CAS<br>221168     | Bago Div.,<br>Myanmar                                                               | JQ945335 | JQ945504 | JQ945611 | JQ945717 | JQ945404 | JX041424    |
| G      | <i>Rhoptropus afer</i>              | Yes             | No                   | No             | MCZ<br>R183711    | Rössing Mt.,<br>Namibia                                                             | JQ945336 | JQ945506 | JQ945613 | JQ945719 | JQ945405 | JX041430    |
| G      | <i>Rhoptropus boultoni</i>          | Yes             | No                   | No             | CAS<br>214713     | Twyfelfontein,<br>Namibia                                                           | EF534810 | EF534978 | EF534936 | EF534893 | EF534852 | JX041431    |
| G      | <i>Rhoptropus diporus</i>           | Yes             | No                   | No             | MCZ<br>R183737    | Brandberg Wes<br>Myn, Namibia                                                       | JQ945337 | –        | –        | –        | JQ945406 | JX041432    |
| G      | <i>Rhoptropus diporus</i>           | Yes             | No                   | No             | MCZ<br>R183736    | Brandberg Wes<br>Myn, Namibia<br>Dakhlet                                            | –        | JQ945507 | JQ945614 | JQ945720 | –        | –           |
| G      | <i>Stenodactylus sthenodactylus</i> | No              | N/A                  | No             | MVZ<br>235804     | Nouâdhibou<br>Region,<br>Mauritania                                                 | JQ945339 | –        | –        | –        | JQ945408 | JX041441    |



| Family | Species                             | Toepads present | Leaf-toed morphology | Para-phalanges | ID             | Locality                                  | RAG1     | RAG2     | C-MOS    | ACM4     | PDC      | ND2 + tRNAs |
|--------|-------------------------------------|-----------------|----------------------|----------------|----------------|-------------------------------------------|----------|----------|----------|----------|----------|-------------|
| G      | <i>Stenodactylus sthenodactylus</i> | No              | N/A                  | No             | TG 00181       | Egypt                                     | –        | JQ945510 | JQ945617 | JQ945723 | –        | –           |
| G      | <i>Tenuidactylus caspius</i>        | No              | N/A                  | No             | CAS 228602     | Touran Protected Area, Semnan Prov., Iran | JQ945340 | JQ945514 | JQ945620 | JQ945727 | JQ945409 | JX041448    |
| G      | <i>Tenuidactylus longipes</i>       | No              | N/A                  | No             | CAS 228830     | Tabas, Yazd Prov., Iran                   | JQ945341 | JQ945515 | JQ945621 | JQ945728 | JQ945410 | JX041449    |
| G      | <i>Tropicolotes tripolitanus</i>    | No              | N/A                  | No             | FMNH 262276    | Niger                                     | –        | JQ945517 | JQ945623 | JQ945730 | –        | –           |
| G      | <i>Tropicolotes tripolitanus</i>    | No              | N/A                  | No             | MVZ 238922     | Tafokin, Agadez, Niger                    | JQ945343 | –        | –        | –        | JQ945412 | JX041459    |
| G      | <i>Urocotyledon inexpectatus</i>    | Yes             | Yes                  | No             | MCZF 38723     | Island, Seychelles                        | JQ945344 | JQ945518 | JQ945624 | JQ945731 | JQ945413 | JX041461    |
| G      | <i>Uroplatus giganteus</i>          | Yes             | Yes                  | Yes            | ZSM 55/2005    | Marojejy, Madagascar                      | EF490737 | JQ945519 | JQ945625 | JQ945732 | JQ945414 | EF490790    |
| G      | <i>Uroplatus guentheri</i>          | Yes             | Yes                  | Yes            | ZSM 476/2001   | Ankarafantsika, Madagascar                | EF490725 | JQ945520 | JQ945626 | JQ945733 | EF490699 | EF490778    |
| G      | <i>Uroplatus henkeli</i>            | Yes             | Yes                  | Yes            | FG/MV 2000.C1  | Nosy Be, Madagascar                       | EF490743 | –        | –        | –        | EF490716 | EF490796    |
| G      | <i>Uroplatus henkeli</i>            | Yes             | Yes                  | Yes            | JFBM 15833     | Madagascar                                | –        | HQ426510 | HQ426591 | HQ426420 | –        | –           |
| G      | <i>Uroplatus phantasticus</i>       | Yes             | Yes                  | Yes            | FG/MV 2002.640 | Ranomafana, Madagascar                    | EF490746 | HQ426511 | HQ426592 | HQ426421 | EF490719 | EF490799    |
| Ph     | <i>Asaccus platyrhynchus</i>        | Yes             | Yes                  | No             | CAS 227605     | Wilayat Nazwa, Oman                       | EU293625 | EU293715 | EU293670 | EU293647 | EU293693 | JX041313    |
| Ph     | <i>Asaccus sp.</i>                  | Yes             | Yes                  | No             | JB 15          | Mirbat, Oman                              | EU293626 | EU293716 | EU293671 | EU293648 | EU293694 | JX041314    |
| Ph     | <i>Garthia gaudichaudii</i>         | No              | N/A                  | No             | SC 1           | Chile                                     | HQ426281 | HQ426454 | HQ426536 | HQ426361 | HQ426192 | JX041351    |
| Ph     | <i>Gymnodactylus amarali</i>        | No              | N/A                  | No             | CHUNB 38646    | Cocalzinho, Goiás, Brazil                 | HQ426288 | HQ426457 | HQ426539 | HQ426364 | HQ426199 | JX041366    |
| Ph     | <i>Haemodracon riebeckii</i>        | Yes             | Yes                  | No             | JB 11          | Socotra Island, Yemen                     | EU293627 | EU293717 | EU293672 | EU293649 | EU293695 | JX041367    |
| Ph     | <i>Homonota darwinii</i>            | No              | N/A                  | No             | LJAMM          | Puerto                                    | EU293628 | EU293718 | EU293673 | EU293650 | EU293696 | JX041373    |

| Family | Species                             | Toepads present | Leaf-toed morphology | Para-phalanges | ID          | Locality                                         | RAG1     | RAG2     | C-MOS    | ACM4     | PDC      | ND2 + tRNAs |
|--------|-------------------------------------|-----------------|----------------------|----------------|-------------|--------------------------------------------------|----------|----------|----------|----------|----------|-------------|
|        |                                     |                 |                      |                | 4601        | Deseado, Santa Cruz, Argentina                   |          |          |          |          |          |             |
| Ph     | <i>Homonota fasciata</i>            | No              | N/A                  | No             | TG 00085    | Paraguay                                         | EU293629 | EU293719 | EU293674 | EU293651 | EU293697 | JX041374    |
| Ph     | <i>Phyllodactylus bordai</i>        | Yes             | Yes                  | No             | AMCC 118242 | Puebla, Mexico                                   | HQ426309 | HQ426483 | HQ426565 | HQ426392 | HQ426220 | JX041405    |
| Ph     | <i>Phyllodactylus bugastrolepis</i> | Yes             | Yes                  | No             | ROM 38489   | Isla Santa Catalina, Baja California Sur, Mexico | EU293631 | EU293721 | EU293676 | EU293653 | EU293699 | JX041406    |
| Ph     | <i>Phyllodactylus delcampoi</i>     | Yes             | Yes                  | No             | JAC 21928   | Guerrero, Mexico                                 | HQ426310 | HQ426484 | HQ426566 | HQ426393 | HQ426221 | JX041407    |
| Ph     | <i>Phyllodactylus homolepidurus</i> | Yes             | Yes                  | No             | MVZ 236267  | Hermosillo, Sonora, Mexico                       | JQ945330 | JQ945499 | JQ945606 | JQ945712 | JQ945399 | JX041408    |
| Ph     | <i>Phyllodactylus nocticolus</i>    | Yes             | Yes                  | No             | ROM 39005   | La Paz, Baja California Sur, Mexico              | HQ426311 | HQ426485 | HQ426567 | HQ426394 | HQ426222 | JX041409    |
| Ph     | <i>Phyllodactylus reissii</i>       | Yes             | Yes                  | No             | JB 39       | Peru                                             | EU293632 | EU293722 | EU293677 | EU293654 | EU293700 | JX041410    |
| Ph     | <i>Phyllodactylus tuberculosus</i>  | Yes             | Yes                  | No             | KU 289758   | PN El Imposible, Ahuachapán, El Salvador         | EU293630 | EU293720 | EU293675 | EU293652 | EU293698 | JX041411    |
| Ph     | <i>Phyllodactylus unctus</i>        | Yes             | Yes                  | No             | ROM 39002   | La Paz, Baja California Sur, Mexico              | HQ426312 | HQ426486 | HQ426568 | HQ426395 | HQ426223 | JX041412    |
| Ph     | <i>Phyllodactylus wirshingi</i>     | Yes             | Yes                  | No             | TG 00722    | Guanica, Puerto Rico                             | JQ945331 | JQ945500 | JQ945607 | JQ945713 | JQ945400 | JX041413    |
| Ph     | <i>Phyllodactylus xanti</i>         | Yes             | Yes                  | No             | ROM 38490   | Baja California Sur, Mexico                      | EF534807 | EF534975 | EF534933 | EF534890 | EF534849 | JX041414    |
| Ph     | <i>Phyllopezus lutzae</i>           | Yes             | No                   | Yes            | CHUNB 50462 | Mata de São João, Bahia, Brazil                  | HQ426265 | HQ426438 | HQ426522 | HQ426345 | HQ426177 | JX041415    |

| Family | Species                                      | Toepads present | Leaf-toed morphology | Para-phalanges | ID          | Locality                                              | RAG1     | RAG2     | C-MOS    | ACM4     | PDC      | ND2 + tRNAs |
|--------|----------------------------------------------|-----------------|----------------------|----------------|-------------|-------------------------------------------------------|----------|----------|----------|----------|----------|-------------|
| Ph     | <i>Phyllopezus maranjonensis</i>             | Yes             | No                   | Yes            | ZFMK 84995  | Balsas, Amazonas, Peru                                | EU293633 | EU293723 | EU293678 | EU293655 | EU293701 | JX041416    |
| Ph     | <i>Phyllopezus pollicaris pollicaris</i>     | Yes             | No                   | Yes            | MZUSP 92491 | Parque Nacional da Serra das Confusões, Piauí, Brazil | EU293635 | EU293725 | EU293680 | EU293657 | EU293702 | JX041417    |
| Ph     | <i>Ptyodactylus guttatus</i>                 | Yes             | Yes                  | No             | TG 00072    | Egypt                                                 | EU293636 | EU293726 | EU293681 | EU293658 | EU293703 | JX041425    |
| Ph     | <i>Ptyodactylus</i> cf. <i>hasselquistii</i> | Yes             | Yes                  | No             | YPM 13609   | unknown                                               | EU293637 | EU293727 | EU293682 | EU293659 | EU293704 | JX041426    |
| Ph     | <i>Tarentola americana</i>                   | Yes             | No                   | No             | MVZ 241223  | 13 km E of Pilon, Granma Province, Cuba               | HQ426332 | HQ426503 | HQ426584 | HQ426413 | HQ426243 | JX041442    |
| Ph     | <i>Tarentola chazaliae</i>                   | Yes             | No                   | No             | TG 00130    | Morocco                                               | EU293638 | EU293728 | EU293683 | EU293660 | EU293705 | JX041443    |
| Ph     | <i>Tarentola delalandii</i>                  | Yes             | No                   | No             | JB 43       | Canary Islands                                        | EU293639 | EU293729 | EU293684 | EU293661 | EU293706 | JX041444    |
| Ph     | <i>Tarentola deserti</i>                     | Yes             | No                   | No             | JB 44       | unknown                                               | HQ426333 | HQ426504 | HQ426585 | HQ426414 | HQ426244 | JX041445    |
| Ph     | <i>Tarentola fascicularis</i>                | Yes             | No                   | No             | JB 29       | unknown                                               | HQ426334 | HQ426505 | HQ426586 | HQ426415 | HQ426245 | JX041446    |
| Ph     | <i>Tarentola mauritanica</i>                 | Yes             | No                   | No             | TG 00129    | Egypt                                                 | EU293641 | EU293731 | EU293686 | EU293663 | EU293708 | JX041447    |
| Ph     | <i>Thecadactylus rapicauda</i>               | Yes             | No                   | Yes            | USNM 561446 | St. Croix, U.S. Virgin Islands                        | EU293643 | EU293733 | EU293688 | EU293665 | EU293710 | JX041456    |
| Ph     | <i>Thecadactylus rapicauda</i>               | Yes             | No                   | Yes            | ENS 7108    | Izabal, Guatemala                                     | EU293642 | EU293732 | EU293687 | EU293664 | EU293709 | JX041455    |
| Ph     | <i>Thecadactylus solimoensis</i>             | Yes             | No                   | Yes            | KU 214929   | Cuzco Amazonico, Madre de Dios, Peru                  | EU293644 | EU293734 | EU293689 | EU293666 | EU293711 | JX041457    |
| Ph     | <i>Thecadactylus</i> sp.                     | Yes             | No                   | Yes            | JB 25       | Union Id., St. Vincent and Grenadines                 | JQ945342 | JQ945516 | JQ945622 | JQ945729 | JQ945411 | JX041458    |

| Family | Species                          | Toepads present | Leaf-toed morphology | Para-phalanges | ID         | Locality                                             | RAG1     | RAG2     | C-MOS    | ACM4     | PDC      | ND2 + tRNAs |
|--------|----------------------------------|-----------------|----------------------|----------------|------------|------------------------------------------------------|----------|----------|----------|----------|----------|-------------|
| Py     | <i>Aprasia parapulchella</i>     | No              | N/A                  | No             | MV D66569  | Bendigo Whipstick, Victoria, Australia               | HQ426260 | HQ426433 | AY134539 | HQ426339 | HQ426172 | GU459941    |
| Py     | <i>Delma butleri</i>             | No              | N/A                  | No             | SAM R36144 | Coonbah, New South Wales, Australia                  | HQ426276 | HQ426449 | AY134548 | HQ426356 | HQ426187 | AY134584    |
| Py     | <i>Delma tincta</i>              | No              | N/A                  | No             | AMS 151607 | Sturt Natl. Pk., NSW, Australia                      | HQ426277 | HQ426450 | AY172926 | HQ426357 | HQ426188 | JX041347    |
| Py     | <i>Lialis burtonis</i>           | No              | N/A                  | No             | TG 00078   | Provinsi Papua, Indonesia                            | EF534782 | EF534948 | EF534906 | EF534863 | EF534822 | JX024354    |
| Py     | <i>Ophidiocephalus taeniatus</i> | No              | N/A                  | No             | SAM R44653 | Todmorden Station, South Australia, Australia        | HQ426303 | HQ426476 | AY134565 | HQ426385 | HQ426214 | AY134601    |
| Py     | <i>Paradelma orientalis</i>      | No              | N/A                  | No             | QM J56089  | 20 km N Capella, Queensland, Australia               | HQ426304 | HQ426477 | AY134569 | HQ426386 | HQ426215 | AY134605    |
| Py     | <i>Pletholax gracilis</i>        | No              | N/A                  | No             | WBJ 2483   | Lesueur National Park, Western Australia, Australia  | HQ426315 | HQ426489 | AY134566 | HQ426398 | HQ426227 | AY134602    |
| Py     | <i>Pygopus lepidopodus</i>       | No              | N/A                  | No             | WBJ 1206   | Lesueur National Park, Western Australia, Australia  | HQ426319 | HQ426493 | AY134567 | HQ426402 | HQ426231 | AY134603    |
| Py     | <i>Pygopus nigriceps</i>         | No              | N/A                  | No             | MVZ 197233 | 81 km S Alice Springs, Northern Territory, Australia | EF534783 | EF534949 | EF534907 | EF534864 | EF534823 | JX024355    |

| Family | Species                              | Toepads present | Leaf-toed morphology | Para-phalanges | ID            | Locality                              | RAG1     | RAG2     | C-MOS    | ACM4     | PDC      | ND2 + tRNAs |
|--------|--------------------------------------|-----------------|----------------------|----------------|---------------|---------------------------------------|----------|----------|----------|----------|----------|-------------|
| S      | <i>Aristelliger georgeensis</i>      | Yes             | No                   | No             | JB 101        | unknown                               | HQ426261 | HQ426434 | HQ426518 | HQ426340 | HQ426173 | JX041310    |
| S      | <i>Aristelliger lar</i>              | Yes             | No                   | No             | JB 01         | Dominican Republic                    | EF534805 | EF534973 | EF534931 | EF534888 | EF534847 | JX041311    |
| S      | <i>Aristelliger praesignis</i>       | Yes             | No                   | No             | USNM 337563   | Kingston, St. Andrew Parish, Jamaica  | HQ426262 | HQ426435 | HQ426519 | HQ426342 | HQ426174 | JX041312    |
| S      | <i>Chatogekko amazonicus</i>         | Yes             | Yes                  | No             | LSUMZ H-16400 | Manaus, Amazonas, Brazil              | HQ426268 | HQ426441 | HQ426525 | HQ426348 | HQ426179 | JX041319    |
| S      | <i>Coleodactylus brachystoma</i>     | Yes             | Yes                  | No             | MZUSP 92569   | Piauí, Brazil                         | EF534792 | EF534959 | EF534917 | EF534874 | EF534833 | JX041330    |
| S      | <i>Coleodactylus cf. brachystoma</i> | Yes             | Yes                  | No             | CHUNB 43901   | São Domingos, Goiás, Brazil           | HQ426270 | HQ426443 | HQ426527 | HQ426350 | HQ426181 | JX041331    |
| S      | <i>Coleodactylus septentrionalis</i> | Yes             | Yes                  | No             | LSUMZ H-12351 | Roraima, Brazil                       | EF534791 | EF534958 | EF534916 | EF534873 | EF534832 | JX041332    |
| S      | <i>Euleptes europaea</i>             | Yes             | Yes                  | No             | No ID         | Liguria, Italy                        | EF534806 | EF534974 | EF534932 | EF534889 | EF534848 | JN393941    |
| S      | <i>Gonatodes albogularis</i>         | No              | N/A                  | No             | MVZ 204073    | Limon, Costa Rica                     | EF534797 | –        | –        | –        | EF534839 | JX041354    |
| S      | <i>Gonatodes albogularis</i>         | No              | N/A                  | No             | KU 289808     | San Salvador, El Salvador             | –        | EF534965 | EF534923 | EF534880 | –        | –           |
| S      | <i>Gonatodes alexandermendesi</i>    | No              | N/A                  | No             | BPN 1303      | Imbaimadai, Guyana                    | EF534798 | EF534966 | EF534924 | EF534881 | EF534840 | JX041355    |
| S      | <i>Gonatodes annularis</i>           | No              | N/A                  | No             | ROM 22961     | Guyana                                | –        | EF534961 | EF534919 | EF534876 | –        | –           |
| S      | <i>Gonatodes annularis</i>           | No              | N/A                  | No             | No ID         | French Guiana                         | EF534794 | –        | –        | –        | EF534835 | JX041356    |
| S      | <i>Gonatodes caudiscutatus</i>       | No              | N/A                  | No             | KU 218359     | Limon, Ecuador                        | EF534795 | EF534962 | EF534920 | EF534877 | EF534836 | JX041357    |
| S      | <i>Gonatodes ceciliae</i>            | No              | N/A                  | No             | TG 00039      | Trinidad                              | –        | EF564114 | EF564088 | EF564062 | HQ426193 | JX041358    |
| S      | <i>Gonatodes concinnatus</i>         | No              | N/A                  | No             | LSUMZ H-12688 | Sucumbios, Ecuador                    | HQ426282 | EF564096 | EF564070 | EF564044 | HQ426194 | JX041359    |
| S      | <i>Gonatodes daudini</i>             | No              | N/A                  | No             | JB 38         | Union Id., St. Vincent and Grenadines | EF534793 | EF534960 | EF534918 | EF534875 | EF534834 | JX041360    |
| S      | <i>Gonatodes humeralis</i>           | No              | N/A                  | No             | MF 19492      | Ecuador                               | EF534796 | EF534964 | EF534922 | EF534879 | EF534838 | JX041361    |

| Family | Species                               | Toepads present | Leaf-toed morphology | Para-phalanges | ID           | Locality                         | RAG1     | RAG2     | C-MOS    | ACM4     | PDC      | ND2 + tRNAs |
|--------|---------------------------------------|-----------------|----------------------|----------------|--------------|----------------------------------|----------|----------|----------|----------|----------|-------------|
| S      | <i>Gonatodes ocellatus</i>            | No              | N/A                  | No             | TG 00038     | Tobago                           | HQ426284 | EF564098 | EF564072 | EF564046 | HQ426196 | JX041362    |
| S      | <i>Gonatodes vittatus</i>             | No              | N/A                  | No             | TG 00040     | Trinidad                         | HQ426285 | EF564112 | EF564086 | EF564060 | –        | JX041363    |
| S      | <i>Lepidoblepharis</i> sp.            | No              | N/A                  | No             | KU 218367    | Manabi, Ecuador                  | EF534789 | EF534956 | EF534914 | EF534871 | EF534830 | JX041375    |
| S      | <i>Lepidoblepharis xanthostigma</i>   | No              | N/A                  | No             | MVZ 171438   | Limon, Costa Rica                | EF534790 | EF534957 | EF534915 | EF534872 | EF534831 | JX041376    |
| S      | <i>Pristurus carteri</i>              | No              | N/A                  | No             | TG 00083     | Yemen                            | EF534803 | EF534971 | EF534929 | EF534886 | EF534845 | JX041419    |
| S      | <i>Pseudogonatodes guianensis</i>     | No              | N/A                  | No             | KU 222142    | Loreto, Peru                     | EF534784 | EF534950 | EF534908 | EF534865 | EF534824 | JX041421    |
| S      | <i>Quedenfeldtia moerens</i>          | No              | N/A                  | No             | JB 77        | Morocco                          | HQ426320 | HQ426494 | HQ426574 | HQ426403 | HQ426232 | JX041427    |
| S      | <i>Quedenfeldtia trachyblepharus</i>  | No              | N/A                  | No             | MVZ 178121   | Oukaimeden, Morocco              | EF534804 | EF534972 | EF534930 | EF534887 | EF534846 | JX041428    |
| S      | <i>Saurodactylus brosseti</i>         | No              | N/A                  | No             | TG 00082     | Morocco                          | EF534802 | EF534970 | EF534928 | EF534885 | EF534844 | JX041433    |
| S      | <i>Saurodactylus fasciatus</i>        | No              | N/A                  | No             | DJH M616     | Zumi, Morocco                    | HQ426322 | HQ426495 | HQ426576 | HQ426405 | HQ426234 | JX041434    |
| S      | <i>Saurodactylus mauritanicus</i>     | No              | N/A                  | No             | DJH Sm61     | NW of Ain Benimather, Morocco    | HQ426323 | HQ426496 | HQ426577 | HQ426406 | HQ426235 | JX041435    |
| S      | <i>Sphaerodactylus argus</i>          | Yes             | Yes                  | No             | TG 00125     | Key West, Florida, USA           | HQ426324 | HQ426497 | HQ426578 | HQ426407 | HQ426236 | JX041436    |
| S      | <i>Sphaerodactylus elegans</i>        | Yes             | Yes                  | No             | YPM 14795    | Monroe County, Florida, USA      | EF534787 | EF534954 | EF534912 | EF534869 | EF534828 | JN393942    |
| S      | <i>Sphaerodactylus glaucus</i>        | Yes             | Yes                  | No             | JAC 24229    | Oaxaca, Mexico                   | HQ426325 | HQ426498 | HQ426579 | HQ426408 | HQ426237 | JX041437    |
| S      | <i>Sphaerodactylus nicholsi</i>       | Yes             | Yes                  | No             | TG 00211     | Bahia de la Ballena, Puerto Rico | HQ426328 | HQ426501 | HQ426582 | HQ426411 | HQ426240 | JX041438    |
| S      | <i>Sphaerodactylus nigropunctatus</i> | Yes             | Yes                  | No             | FLMNH 144010 | Long Island, Bahamas             | HQ426329 | EF534953 | EF534911 | EF534868 | EF534827 | JX041439    |
| S      | <i>Sphaerodactylus roosevelti</i>     | Yes             | Yes                  | No             | CAS 198428   | Bahia de la Ballena, Puerto Rico | EF534785 | EF534951 | EF534909 | EF534866 | EF534825 | JN393943    |

| Family | Species                           | Toepads present | Leaf-toed morphology | Para-phalanges | ID          | Locality                       | RAG1              | RAG2              | C-MOS              | ACM4             | PDC                | ND2 + tRNAs |
|--------|-----------------------------------|-----------------|----------------------|----------------|-------------|--------------------------------|-------------------|-------------------|--------------------|------------------|--------------------|-------------|
| S      | <i>Sphaerodactylus torrei</i>     | Yes             | Yes                  | No             | JB 34       | Cuba                           | EF534788          | EF534955          | EF534913           | EF534870         | EF534829           | JX041440    |
| S      | <i>Teratoscincus keyserlingii</i> | No              | N/A                  | No             | CAS 228808  | Yazd Province, Iran            | EF534801          | HQ426508          | HQ426589           | HQ426418         | EF534843           | JX041450    |
| S      | <i>Teratoscincus microlepis</i>   | No              | N/A                  | No             | TG 00074    | Pakistan                       | EF534800          | EF534968          | EF534926           | EF534883         | EF534842           | JX041451    |
| S      | <i>Teratoscincus przewalskii</i>  | No              | N/A                  | No             | JFBM 15828  | China                          | HQ426335          | HQ426507          | HQ426588           | HQ426417         | HQ426246           | JX041452    |
| S      | <i>Teratoscincus roborowskii</i>  | No              | N/A                  | No             | TG 00070    | China                          | EF534799          | EF534967          | EF534925           | EF534882         | EF534841           | JX041453    |
| S      | <i>Teratoscincus scincus</i>      | No              | N/A                  | No             | JFBM 14252  | Turkmenistan                   | HQ426336          | EF534969          | EF534927           | EF534884         | HQ426247           | JX041454    |
| o      | <i>Amphisbaena alba</i>           | No              | N/A                  | No             | CHUNB 38770 | Distrito Federal, Brasil       | AY662619          | DQ119633          | AY444016           | HQ426422         | HQ426249           | AY662541    |
| o      | <i>Anolis carolinensis</i>        | Yes             | N/A                  | No             | JBL SC1     | South Carolina, USA            | ENSACAT0000005087 | ENSACAT0000005084 | ENSACAG00000017993 | ENSACAT000004095 | ENSACAT00000001314 | -           |
| 0      | <i>Anolis carolinensis</i>        | Yes             | N/A                  | No             | JBL 982     | Louisiana, USA                 | -                 | -                 | -                  | -                | -                  | AF294279    |
| o      | <i>Aspidoscelis tigris</i>        | No              | N/A                  | No             | TG 00069    | Maricopa County, Arizona, USA  | AY662620          | HQ426512          | AF039481           | HQ426423         | HQ426250           | U71332      |
| o      | <i>Dibamus bouretti</i>           | No              | N/A                  | No             | ROM 36056   | Quang Thanh, Cao Bang, Vietnam | AY662645          | HQ426513          | AY662574           | HQ426424         | HQ426251           | AY662562    |
| o      | <i>Elgaria kingii</i>             | No              | N/A                  | No             | TG 00065    | Navajo County, Arizona, USA    | AY662603          | HQ426514          | AF039479           | HQ426425         | HQ426252           | AF085618    |
| o      | <i>Gallus gallus</i>              | No              | N/A                  | No             | -           | -                              | NM001031188       | AY443150          | AY056925           | NM001031191      | XM426634           | X52392      |
| o      | <i>Heloderma suspectum</i>        | No              | N/A                  | No             | TG 00068    | Arizona, USA                   | AY662606          | DQ119635          | AY662566           | HQ426427         | HQ426254           | AB167711    |
| o      | <i>Plestiodon inexpectatus</i>    | No              | N/A                  | No             | TG 00792    | Florida, USA                   | AY662632          | DQ119628          | AY217888           | HQ426426         | HQ426253           | AY607297    |
| o      | <i>Podarcis sicula</i>            | No              | N/A                  | No             | TG 00124    | Topeka, Kansas, USA            | EF632239          | DQ119630          | EF679329           | HQ426428         | HQ426255           | NC011609    |

| Family | Species                        | Toepads present | Leaf-toed morphology | Para-phalanges | ID           | Locality                            | RAG1     | RAG2     | C-MOS    | ACM4     | PDC      | ND2 + tRNAs |
|--------|--------------------------------|-----------------|----------------------|----------------|--------------|-------------------------------------|----------|----------|----------|----------|----------|-------------|
| o      | <i>Ramphotyphlops braminus</i> | No              | N/A                  | No             | No ID        | Minneapolis, Minnesota, USA         | AY662612 | HQ426515 | AF544717 | HQ426429 | HQ426256 | AY662539    |
| o      | <i>Rhineura floridana</i>      | No              | N/A                  | No             | FLMNH 141814 | Alachua County, Florida, USA        | AY662618 | DQ119631 | AY487347 | EF534899 | EU29371  | AY605473    |
| o      | <i>Sphenodon punctatus</i>     | No              | N/A                  | No             | No ID        | New Zealand                         | AY662576 | HQ426516 | AF039483 | HQ426430 | HQ426257 | AF534390    |
| o      | <i>Tiliqua rugosa</i>          | No              | N/A                  | No             | JFBM 13685   | New South Wales, Australia          | EF534815 | EF534983 | EF534941 | EF534898 | EF534856 | JX041462    |
| o      | <i>Xantusia vigilis</i>        | No              | N/A                  | No             | TG 00121     | Los Angeles County, California, USA | AY662642 | DQ119626 | AF148703 | HQ426431 | HQ426258 | U71328      |
