# Supplementary material for: Repeated Origin and Loss of Adhesive Toepads in Geckos
Source: PubMed Central journal article supplement (PMC3384654; doi:10.1371/journal.pone.0039429), 2012-06-27
Supplement: pone.0039429.s008.pdf [file pone.0039429.s008.pdf]

**Table S2. Summary of DNA sequence partitions.** Estimated models of sequence evolution, total number of characters, number of variable sites and number of parsimony-informative sites for each data partition used in the phylogenetic analyses. The number of variable sites and parsimony-informative sites for just the Gekkota, excluding non-gekkotan outgroups, are also shown.

| Partition    | Model   | Number of characters | Number of variable characters | Number of parsimony informative characters | Number of variable characters (Gekkota only) | Number of parsimony informative characters (Gekkota only) |
|--------------|---------|----------------------|-------------------------------|--------------------------------------------|----------------------------------------------|-----------------------------------------------------------|
| nDNA codon 1 | GTR+G   | 898                  | 616                           | 503                                        | 567                                          | 451                                                       |
| nDNA codon 2 | GTR+I+G | 897                  | 533                           | 417                                        | 478                                          | 360                                                       |
| nDNA codon 3 | GTR+I+G | 897                  | 871                           | 855                                        | 861                                          | 834                                                       |
| ND2 codon 1  | GTR+I+G | 334                  | 310                           | 289                                        | 308                                          | 287                                                       |
| ND2 codon 2  | GTR+G   | 334                  | 301                           | 265                                        | 298                                          | 257                                                       |
| ND2 codon 3  | GTR+I+G | 334                  | 334                           | 334                                        | 334                                          | 334                                                       |
| tRNAs        | GTR+I+G | 412                  | 385                           | 351                                        | 382                                          | 346                                                       |
